# Supplementary material for: Ni2P immobilized on N,P-codoped porous carbon sheets for alkali metal ion batteries and storage mechanism
Source: Royal Society of Chemistry journal article supplement (doi:10.1039/d2ta09890c), 2023-01-01
Supplement: d2ta09890c1.pdf [file d2ta09890c1.pdf]

## Electronic supplementary information

### **Ni<sub>2</sub>P Immobilized on N,P-Codoped Porous Carbon Sheets for Alkali Metal Ion Batteries and Storage Mechanism**

Mingzhe Zhang,<sup>a</sup> Yazhan Liang,<sup>a</sup> Fan Liu,<sup>a</sup> Xuguang An,<sup>b</sup> Jinkui Feng,<sup>c</sup> Baojuan Xi<sup>\*a</sup>  
and Shenglin Xiong<sup>\*a</sup>

<sup>a</sup> School of Chemistry and Chemical Engineering, State Key Laboratory of Crystal Materials, Shandong University, Jinan, P.R. China

<sup>b</sup> School of Mechanical Engineering, Chengdu University, Chengdu 610106

<sup>c</sup> School of Materials Science and Engineering, Shandong University, Jinan 250061

\*Correspondence author. Email: [baojuanxi@sdu.edu.cn](mailto:baojuanxi@sdu.edu.cn) (B.J.X.) or [chexsl@sdu.edu.cn](mailto:chexsl@sdu.edu.cn) (S.L.X.)

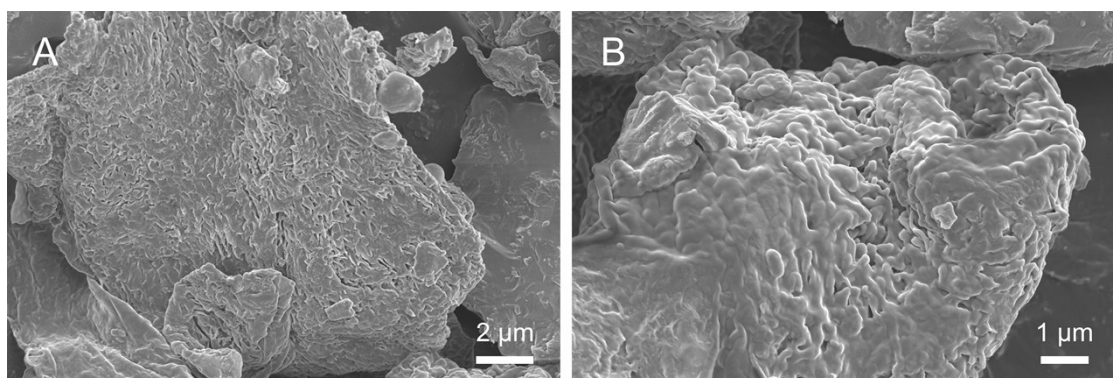

**Figure S1.** FESEM images of precursor PA-MA-Ni.

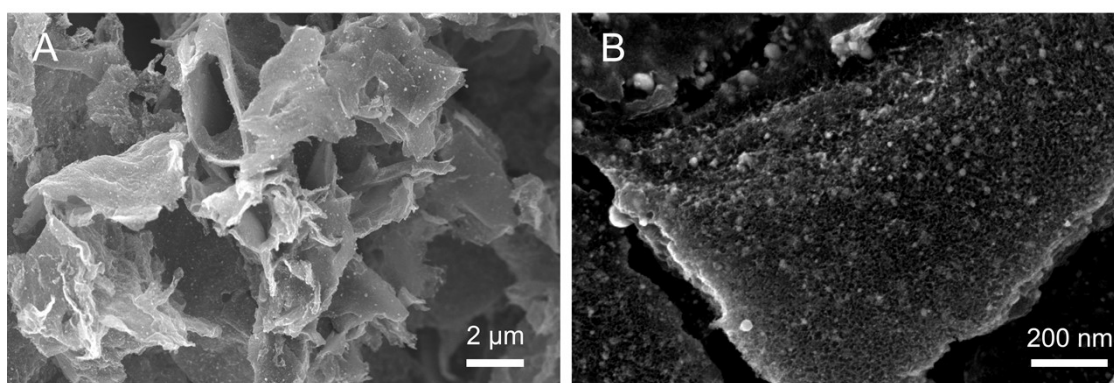

**Fig. S2.** (A,B) FESEM images of  $\text{Ni}_2\text{PcN/P-CNS}$ .

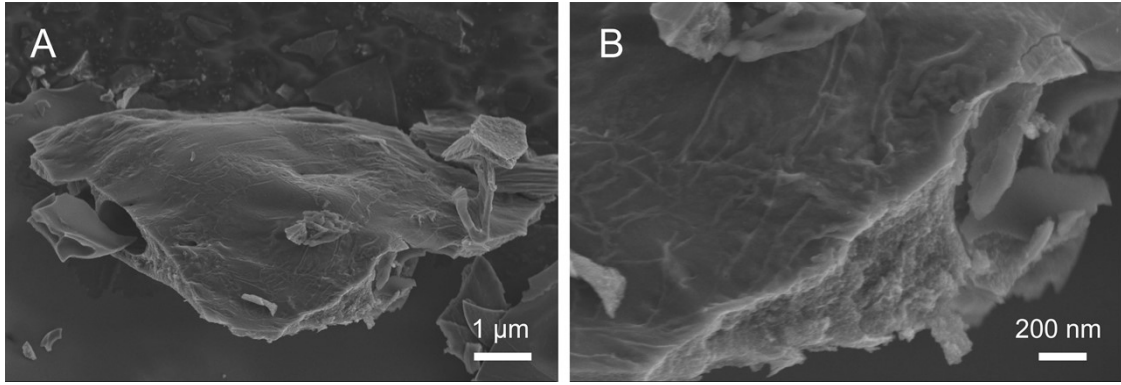

**Figure S3.** (A,B) FESEM images of N/P-CNS.

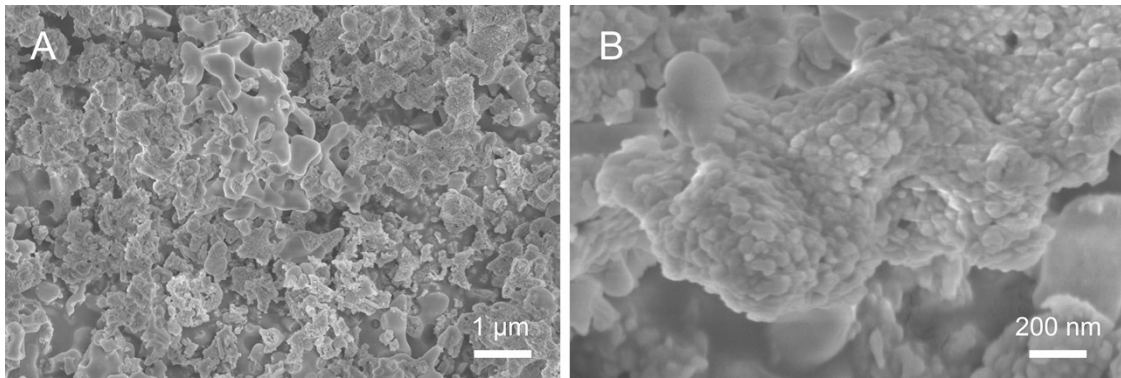

**Figure S4.** (A,B) FESEM images of Ni<sub>2</sub>P.

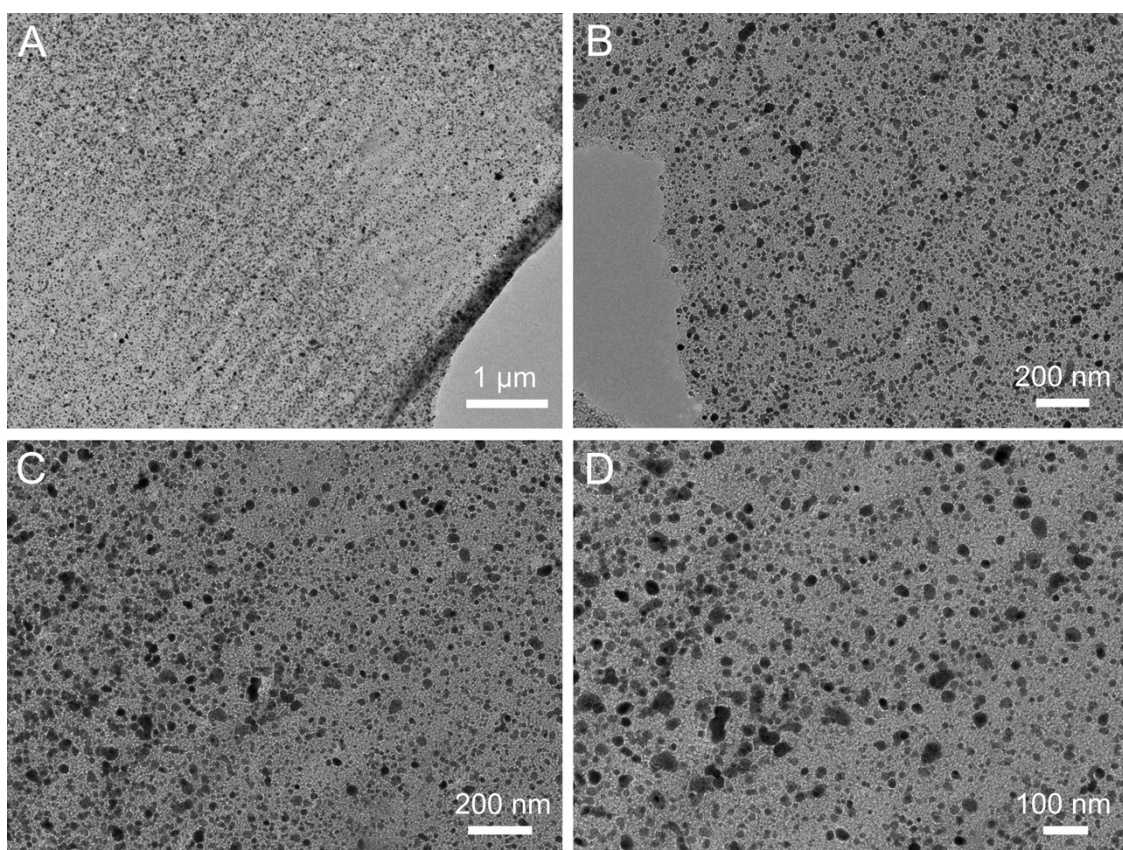

**Figure S5.** TEM images of Ni<sub>2</sub>P@N/P-CNS.

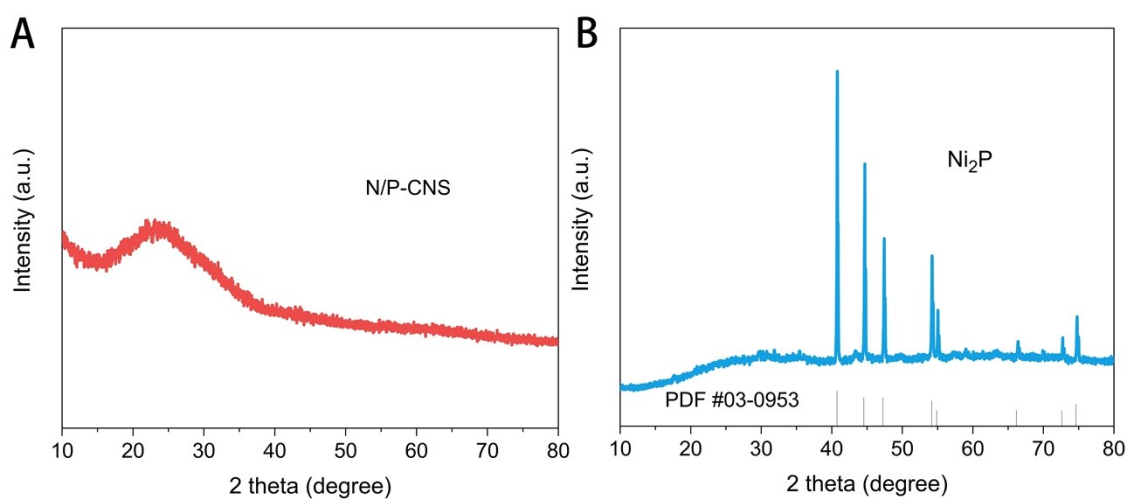

**Figure S6.** XRD patterns of A) N/P-CNS and B) Ni<sub>2</sub>P.

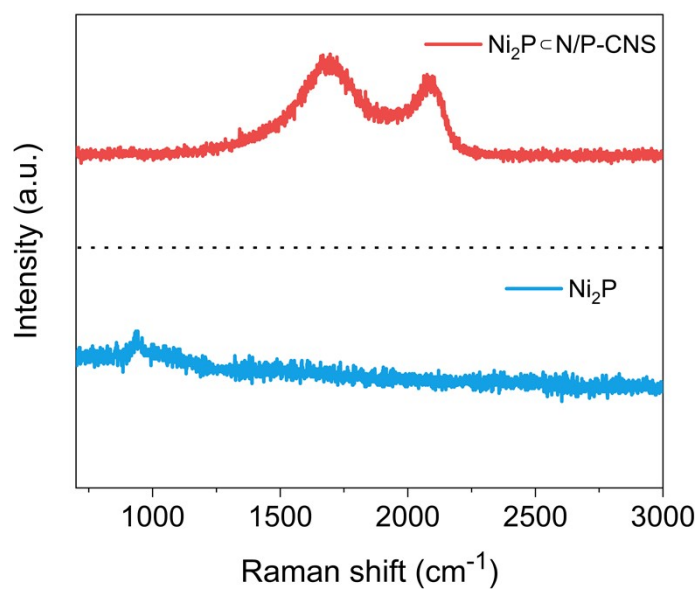

**Figure S7.** Raman spectra for Ni<sub>2</sub>P@N/P-CNS and Ni<sub>2</sub>P.

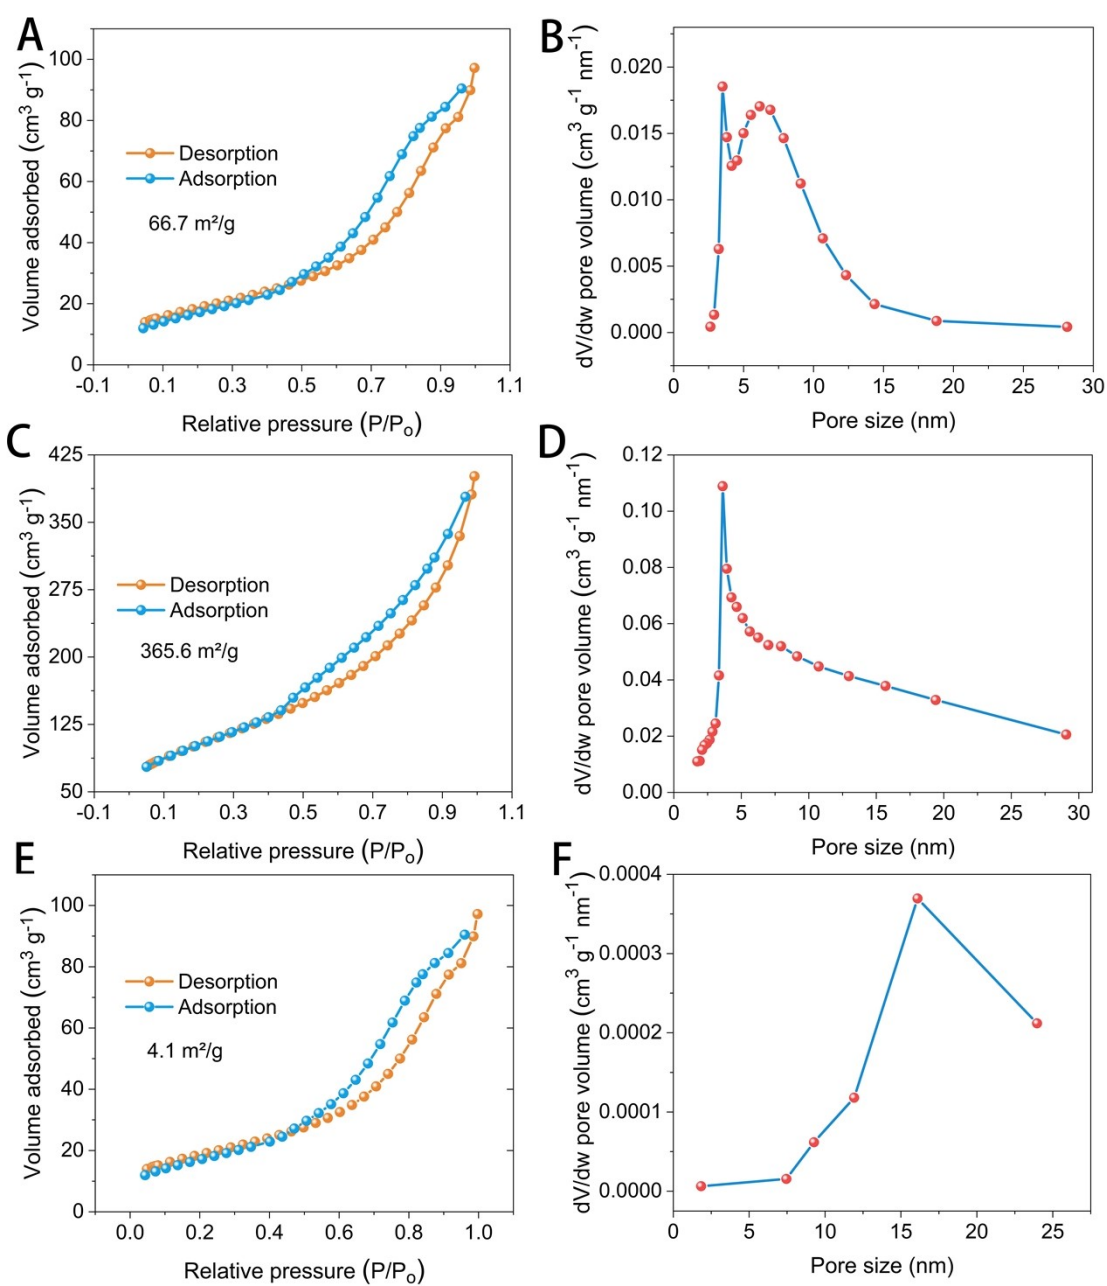

**Figure S8.** A), C), E)  $N_2$  adsorption-desorption isotherms of the N/P-CNS,  $Ni_2P$ -CNS and  $Ni_2P$  at 77 K. B), D), F) corresponding pore size distribution.

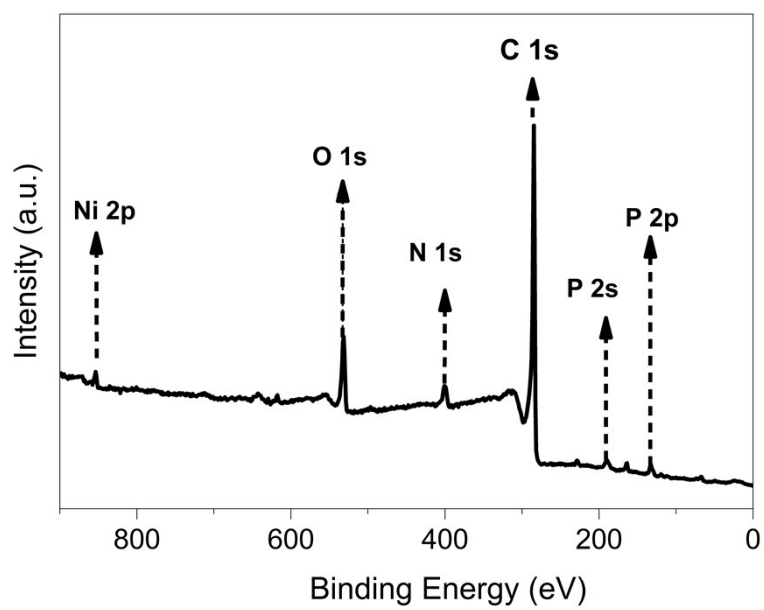

**Figure S9.** XPS spectrum of Ni<sub>2</sub>PcN/P-CNS.

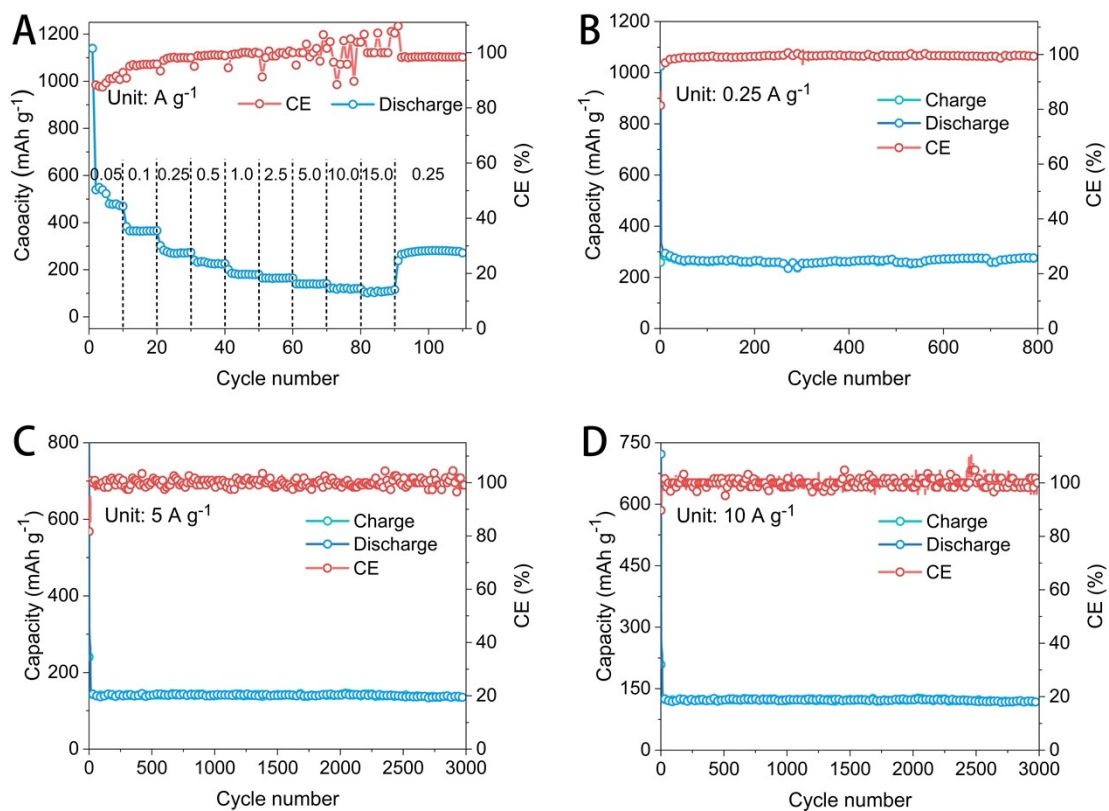

**Figure S10.** A) Rate performance at different current densities of  $\text{Ni}_2\text{PcN/P-CNS}$  and corresponding CE. B–D) Cycling performance and the corresponding CE of  $\text{Ni}_2\text{PcN/P-CNS}$  electrodes at 0.25, 5, and 10  $\text{A g}^{-1}$ , respectively.



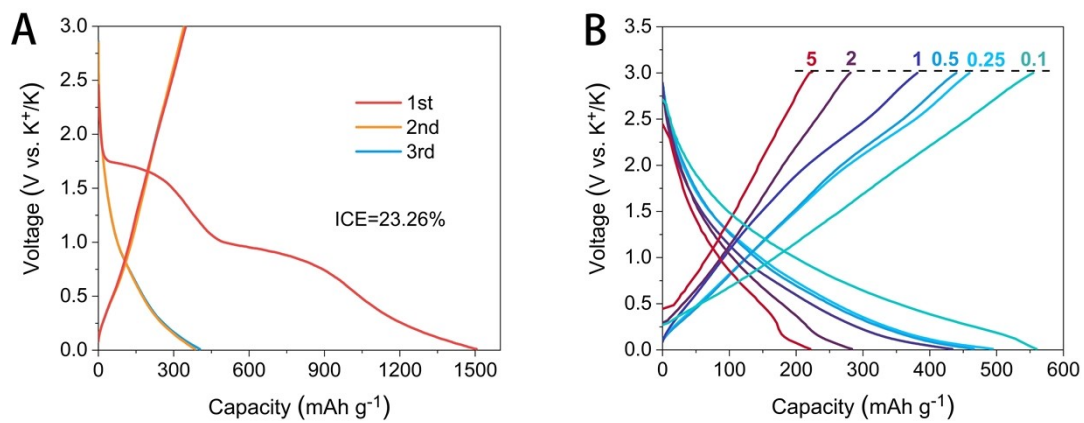

**Figure S11.** Charge–discharge voltage profiles of A) the first three cycles at a current density of 100 mA g<sup>-1</sup> and B) at different current densities of Ni<sub>2</sub>P@N/P-CNS.

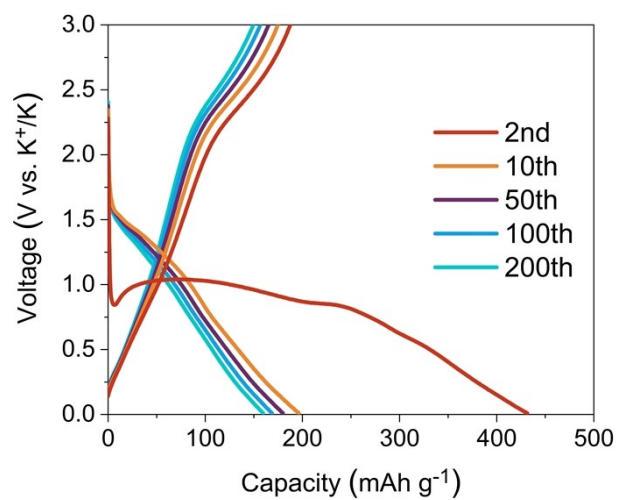

**Figure S12.** Charge-discharge voltage profiles of Ni<sub>2</sub>P at the first five cycles at a current density of 0.1 A g<sup>-1</sup>.

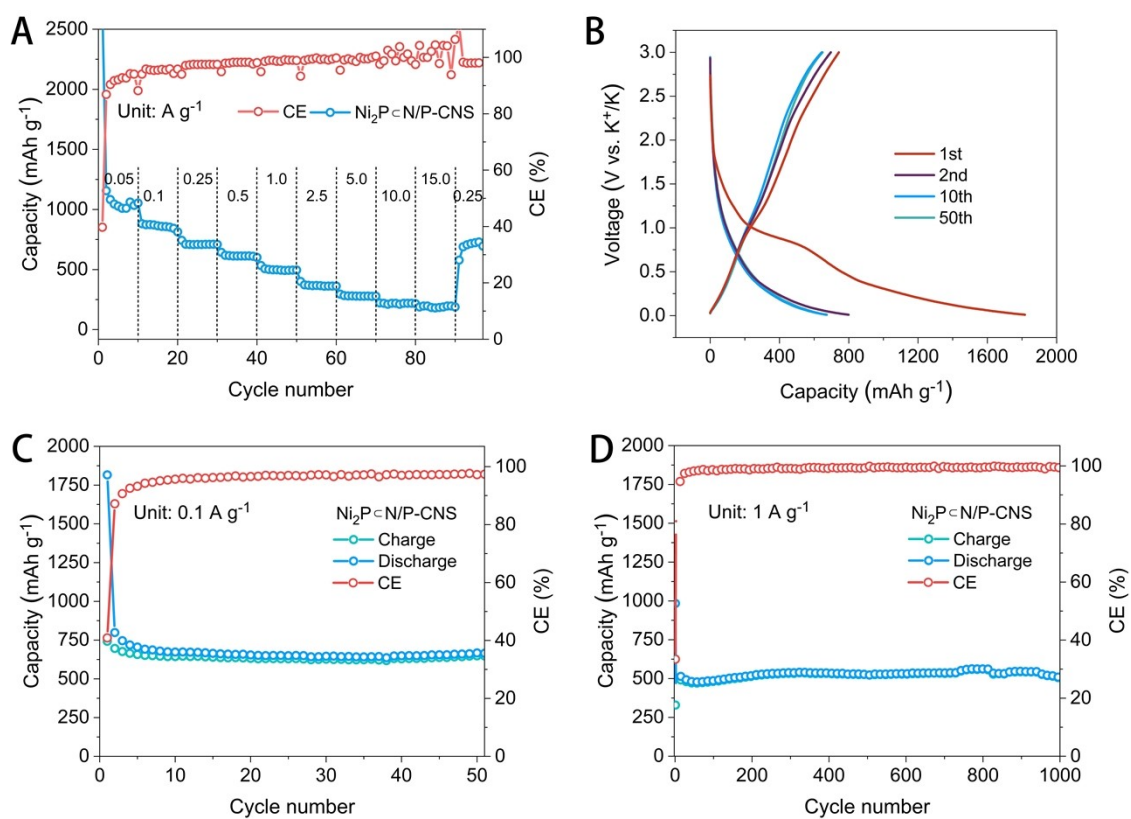

**Figure S13.** Performance of  $\text{Ni}_2\text{PcN/P-CNS}$  as LIB anode material: A) Rate performance at different current densities. B) Charge–discharge voltage profiles at  $0.1 \text{ A g}^{-1}$ . C,D) Cycling performance and the corresponding CE at  $0.1$  and  $1 \text{ A g}^{-1}$ .

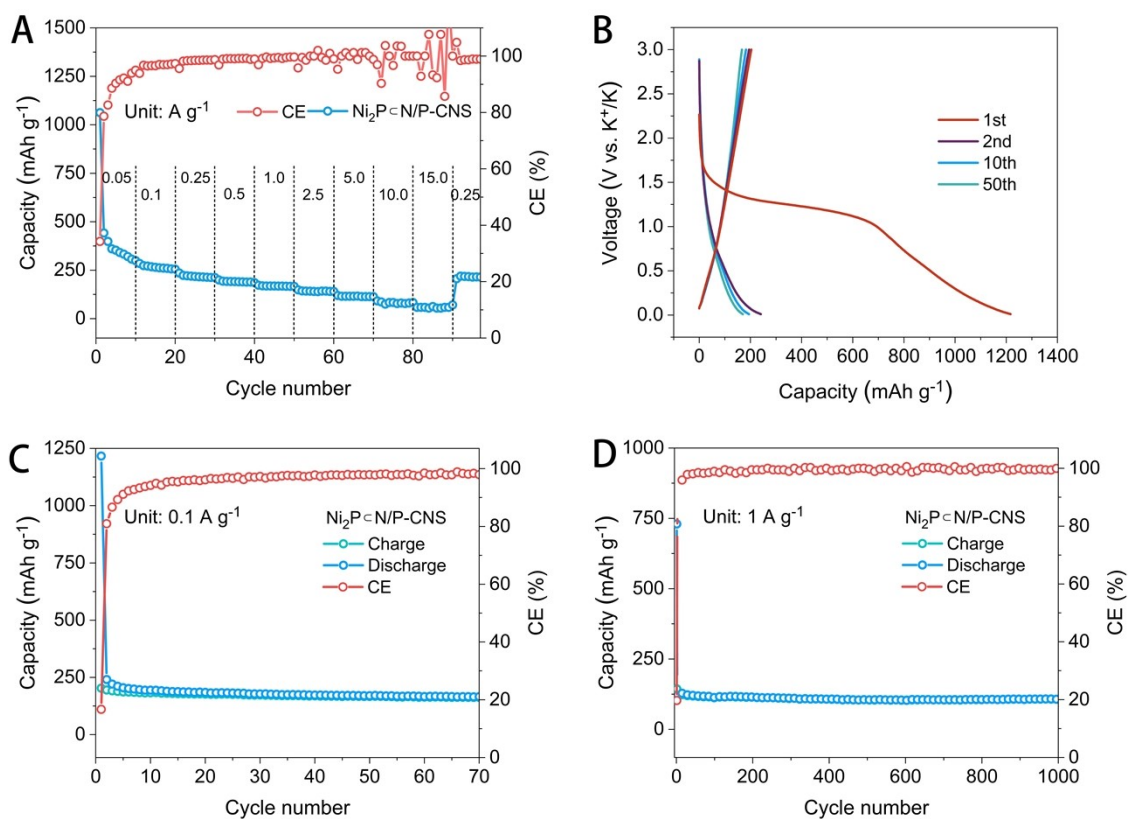

**Figure S14.** Performance of  $\text{Ni}_2\text{PcN/P-CNS}$  as SIB anode material: A) Rate performance at different current densities. B) Charge–discharge voltage profiles at  $0.1 \text{ A g}^{-1}$ . C,D) Cycling performance and the corresponding CE at  $0.1$  and  $1 \text{ A g}^{-1}$ .

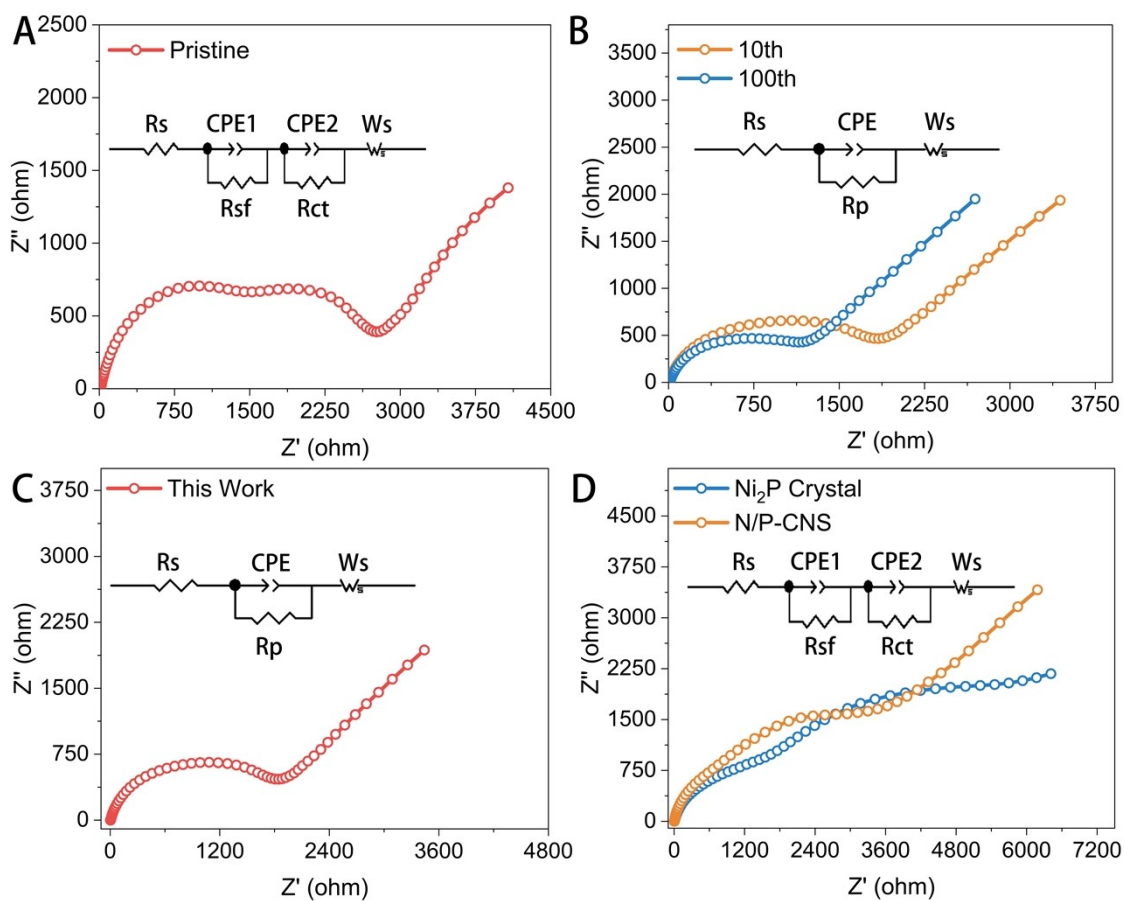

**Figure S15.** A) Nyquist plots of  $Ni_2P@N/P-CNS$  at pristine state and B) at 10<sup>th</sup> and 100<sup>th</sup> cycle. C) Nyquist plots after initial several cycles of  $Ni_2P@N/P-CNS$  and D)  $Ni_2P$  Crystal and N/P-CNS.

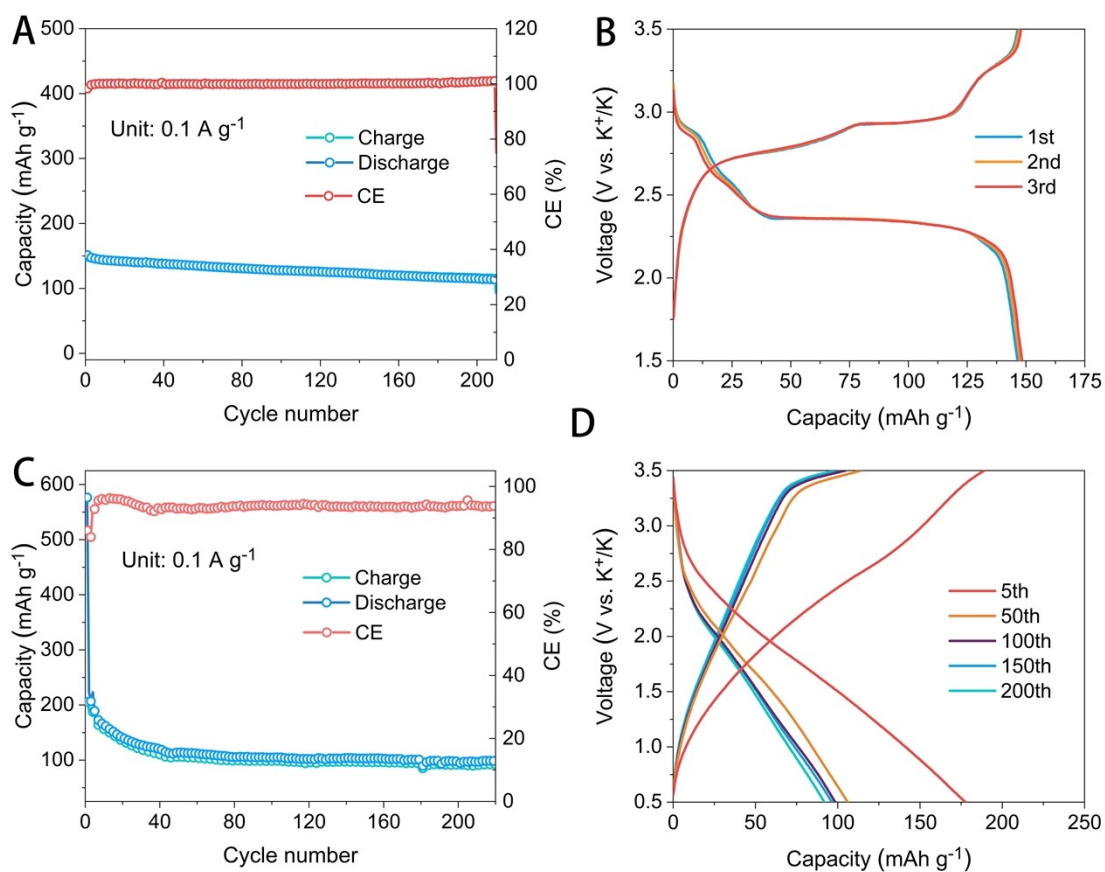

**Figure S16.** Electrochemical potassium storage performance of the Ni<sub>2</sub>P@N/P-CNSs //PTCDA K-ion full cell and Ni<sub>2</sub>P@NC@NCFs anode at high areal loading. A) Cycling performance of the PTCDA cathode at 100 mA g<sup>-1</sup>. B) Charge–discharge voltage profiles of PTCDA cathode for the initial three cycles at 100 mA g<sup>-1</sup>. C, D) Cycling performance and charge–discharge voltage profiles of the full cell at 100 mA g<sup>-1</sup>.

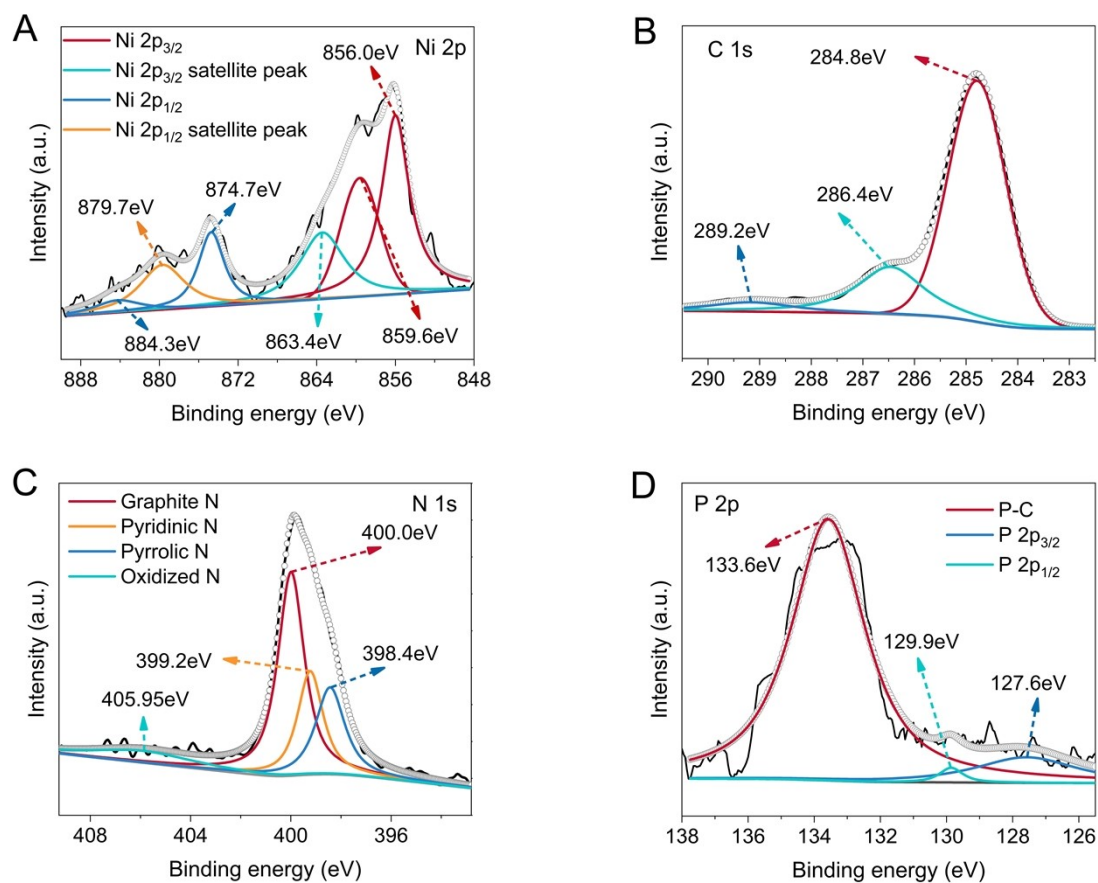

**Figure S17.** High-resolution XPS spectra of Ni 2p, C 1s, N 1s and P 2p of Ni<sub>2</sub>P-C/N/P-CNS electrode after cycling for 100 cycles.

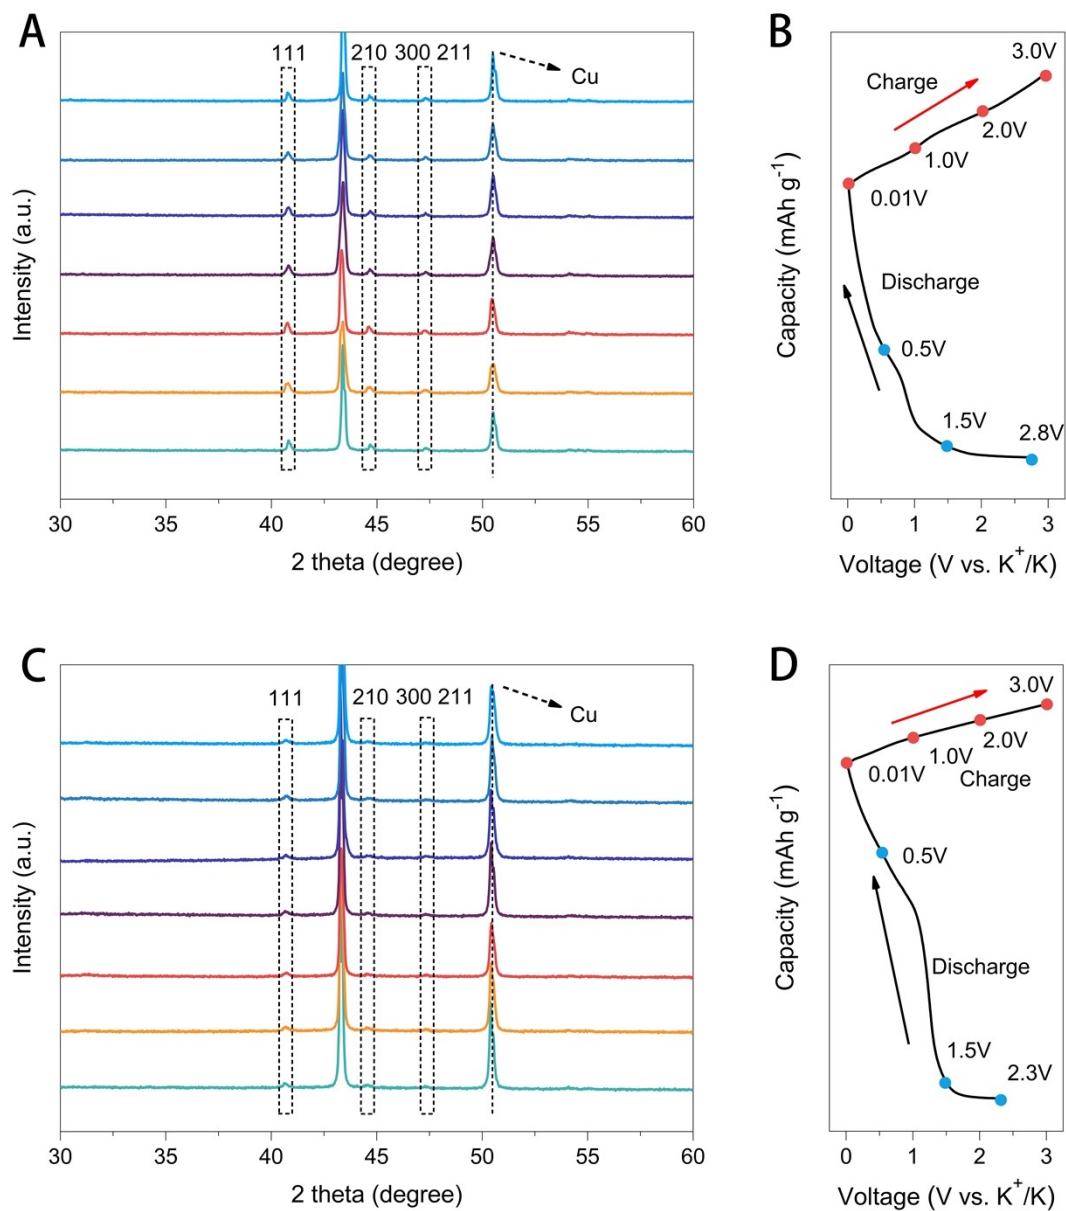

**Figure S18.** A) Ex situ XRD patterns of  $\text{Ni}_2\text{P}/\text{CN}/\text{P-CNS}$  for LIBs and B) the corresponding charge–discharge curve of the first cycle. C) Ex situ XRD patterns of  $\text{Ni}_2\text{P}/\text{CN}/\text{P-CNS}$  for SIBs and D) the corresponding charge–discharge curve of the first cycle.



**Table S1.** The elemental analysis results for the Ni<sub>2</sub>P<sub>C</sub>N/P-CNS.

|                       | C    | N   | H   |
|-----------------------|------|-----|-----|
| Elemental content (%) | 30.5 | 1.8 | 1.0 |

**Table S2.** Comparison of electrochemical performance of this work with previous materials applied in Potassium-ion batteries.

| Materials                              | Current density (mA g <sup>-1</sup> ) /Capacity (mAh g <sup>-1</sup> ) | Rate/Cycle number/Capacity decay rate (%) | Refs.     |
|----------------------------------------|------------------------------------------------------------------------|-------------------------------------------|-----------|
| Ni <sub>2</sub> P <sub>C</sub> N/P-CNS | 1000/180                                                               | 2000/0.016                                | This work |
| CNT/MoP                                | 1000/252                                                               | 1000/15.8                                 | [S1]      |
| CoP@NC                                 | 100/205.7                                                              | 1200/13.2                                 | [S2]      |
| Ni-Fe-P/NC                             | 500/172.9                                                              | 1600/0.026                                | [S3]      |
| Fe/C                                   | 50/288.9                                                               | 50/36.8                                   | [S4]      |
| Cu <sub>3</sub> P                      | 1000/145.9                                                             | 2000/6                                    | [S5]      |
| Ni <sub>2</sub> P@GR                   | /                                                                      | /                                         | [S6]      |

**Table S3.** The fitting results for EIS of different materials.

|                                                      | $R_s$ ( $\Omega$ ) | $R_{sf}$ ( $\Omega$ ) | $R_{ct}$ ( $\Omega$ ) | $R_p$ ( $\Omega$ ) |
|------------------------------------------------------|--------------------|-----------------------|-----------------------|--------------------|
| Ni <sub>2</sub> PcN/P-CNS<br>fresh                   | 10.8               | 1001                  | 1697                  | /                  |
| Ni <sub>2</sub> PcN/P-CNS<br>10 <sup>th</sup> cycle  | 4.5                | /                     | /                     | 1568               |
| Ni <sub>2</sub> PcN/P-CNS<br>100 <sup>th</sup> cycle | 3.7                | /                     | /                     | 929                |
| Ni <sub>2</sub> P                                    | 4.6                | 1885                  | >3000                 |                    |
| N/P-CNS                                              | 3.9                | 484.9                 | 3086                  |                    |

**Note:**  $R_s$  represents the resistance of the electrolyte.  $R_{ct}$  is assigned as the charge-transfer resistance.  $R_{sf}$  is the surface film resistance.  $R_p$  means all the impedance with the  $R_{ct}$  impedance decreased after several cycles.

**Supplementary references:**

[S1] Z. Wang, W. Gao, C. Ding, H. Qi, S. Kang and L. Cui, *J. Colloid Interface Sci.* **2021**, *584*, 875.

[S2] Y. Yun, B. Xi, F. Tian, W. Chen, W. Sun, H. Pan, J. Feng, Y. Qian and S. Xiong, *Adv. Energy Mater.* **2021**, *12*, 2103341.

[S3] X. Chen, S. Zeng, H. Muheiyati, Y. Zhai, C. Li, X. Ding, L. Wang, D. Wang, L. Xu, Y. He and Y. Qian, *ACS Energy Lett.* **2019**, *4*, 1496.

[S4] W. Li, B. Yan, H. Fan, C. Zhang, H. Xu, X. Cheng, Z. Li, G. Jia, S. An and X. Qiu, *ACS Appl. Mater. Interfaces* **2019**, *11*, 22364.

[S5] Y. Yun, B. Xi, Y. Gu, F. Tian, W. Chen, J. Feng, Y. Qian and S. Xiong, *J. Energy Chem.* **2022**, *66*, 339.

[S6] Y.-S. Kim, M.-C. Kim, S.-H. Moon, H. Kim and K.-W. Park, *Electroch. Acta* **2020**, *341*.
